# Supplementary material for: Carbon microtube/graphene hybrid structures for thermal management applications
Source: Royal Society of Chemistry journal article supplement (doi:10.1039/c5ta05115k), 2015-01-01
Supplement: c5ta05115k1.pdf [file c5ta05115k1.pdf]

## Supplementary Information

### Carbon Microtube/Graphene Hybrid Structure for Thermal Management

#### Application

Hui Bi,<sup>a</sup> Haining Huang,<sup>a</sup> Feng Xu,<sup>a</sup> Hui Zhang<sup>a\*</sup> and Fuqiang Huang<sup>a,b\*</sup>

<sup>a</sup> CAS Key Laboratory of Materials for Energy Conversion, Shanghai Institute of Ceramics, Chinese Academy of Sciences, Shanghai 200050, P.R. China

<sup>b</sup> Beijing National Laboratory for Molecular Sciences and State Key Laboratory of Rare Earth Materials Chemistry and Applications, College of Chemistry and Molecular Engineering, Peking University, Beijing 100871, P.R. China

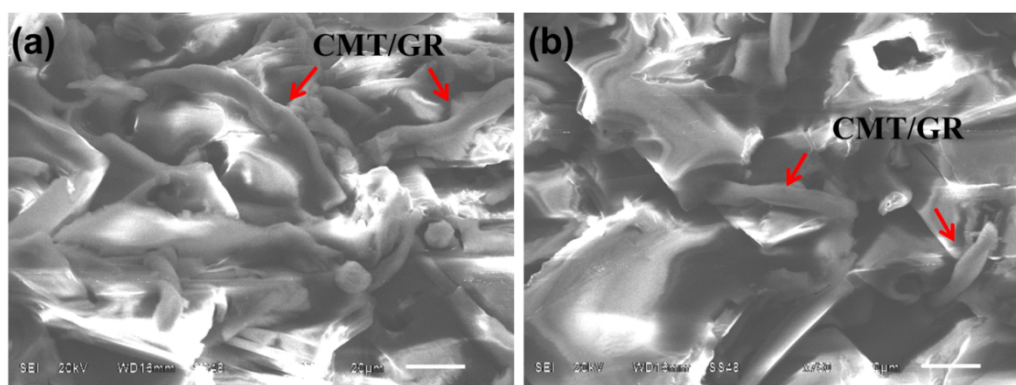

**Figure S1.** (a, b) Cross-sectional SEM images of the CMT/GR/OA composite (a) before and (b) after thermal cycling.

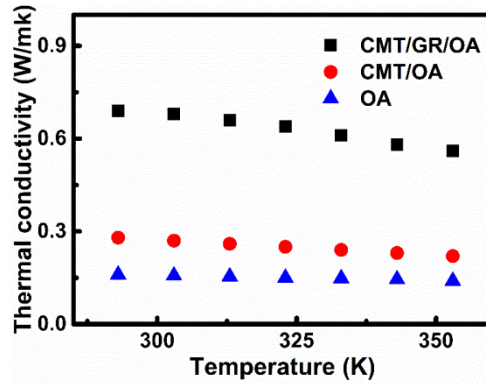

**Figure S2.** Experimentally determined dependence of thermal conductivities of the OA, CMT/OA and CMT/GR/OA composites on temperature.

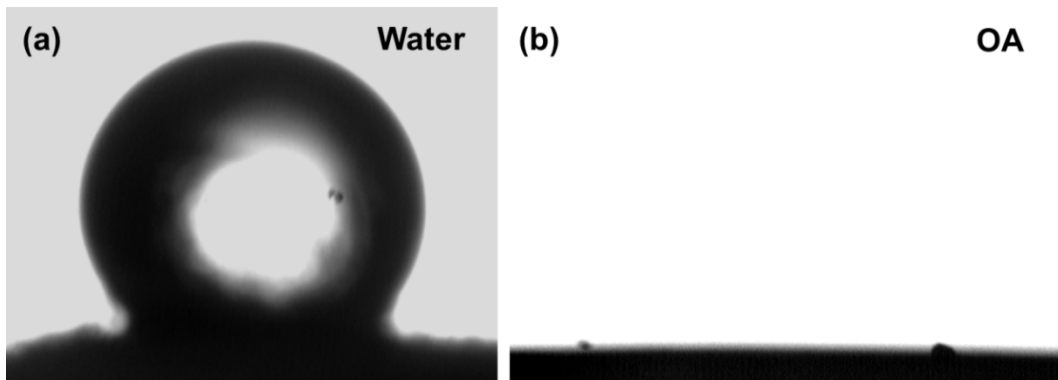

**Figure S3.** (a) Water and (b) OA contact angle measurements on the CMT/GR hybrid structure.
